# Supplementary material for: A Quick Introduction to Version Control with Git and GitHub
Source: PLoS Comput Biol. 2016 Jan 19;12(1):e1004668. doi: 10.1371/journal.pcbi.1004668 (PMC4718703; doi:10.1371/journal.pcbi.1004668)
Supplement: S3 Data — This R script creates diagnostic plots on the length of the peaks and their distribution across the genome. See https://github.com/jdblischak/git-for-science/tree/master/code for instructions on running it. (R) [file pcbi.1004668.s003.R]

#!/usr/bin/env Rscript

# Analyze peak size distribution across chromosomes.

data_dir <- "../data"
sites <- read.table(file.path(data_dir, "sites-union.bed"),
                    stringsAsFactors = FALSE)
colnames(sites) <- c("chr", "start", "end")

sites$chr <- factor(sites$chr, levels = paste0("chr", c(1:22, "X")))
sites$len <- sites$end - sites$start
sites_per_chr <- table(sites$chr)

pdf(file.path(data_dir, "sites-union.pdf"))
par(mfrow = c(3, 1))
hist(sites$len)
boxplot(len ~ chr, data = sites, las = 3)
barplot(sites_per_chr, las = 3)
dev.off()
